# Supplementary material
Source: PubMed Central journal article supplement (PMC6611711)

S. Figure 1. Chemical structure of drugs that inhibit metabolic enzymes FASN (AZ22), ACC (AZ52), DGAT (AZ17), PDHK (AZ30), and cell signalling kinase enzymes PI3K (AZ46), AKT (AZ28) and mTOR (AZ64).

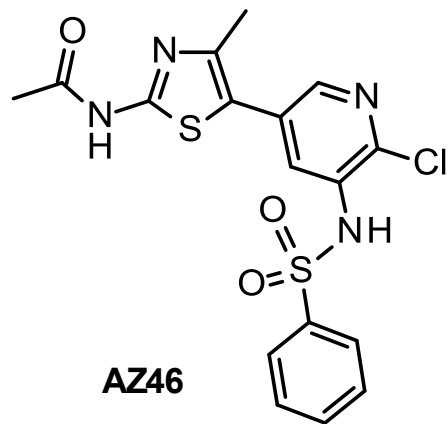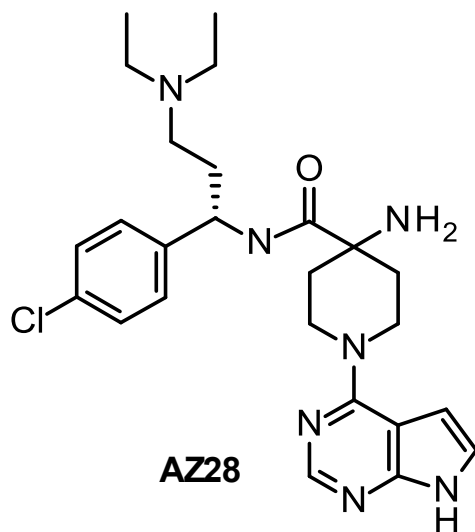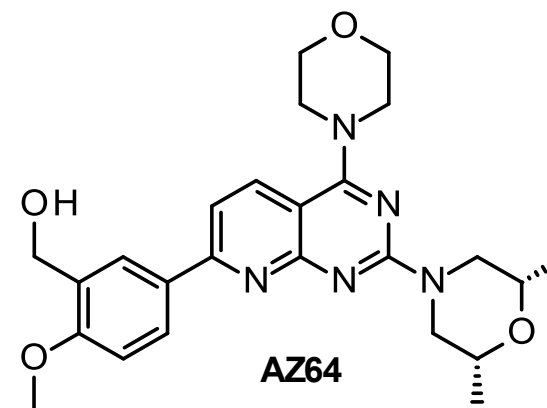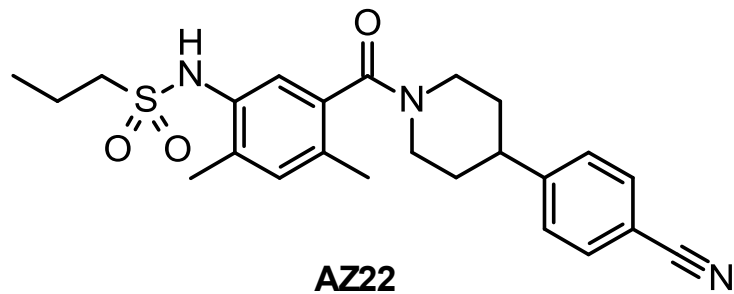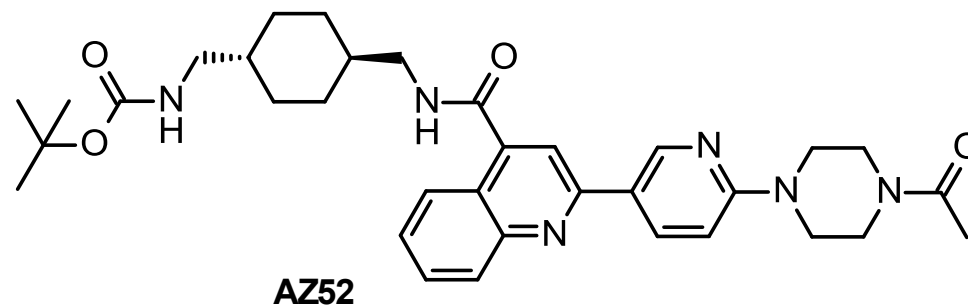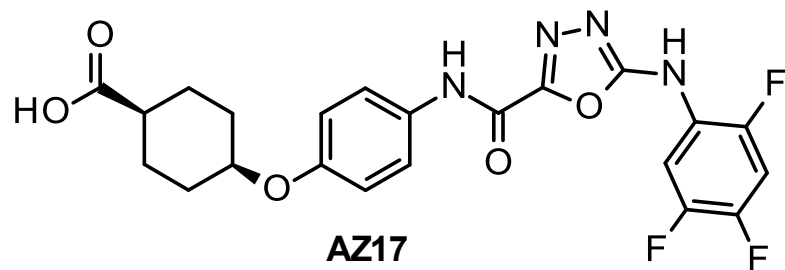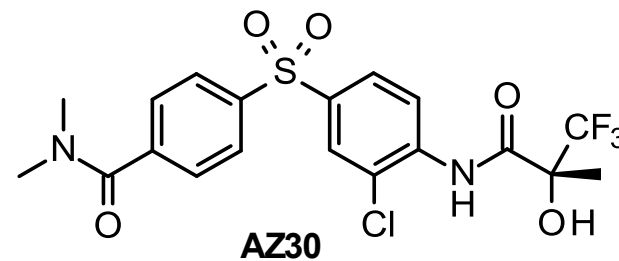

S. Figure 2. Two dimensional CyQuant cell proliferation assay of (A) MDA-MB-468 and (B) PC3 cells following 3 days of treatment under normoxic and hypoxic conditions with inhibitors against metabolic enzymes PDHK, ACC, FASN and DGAT, and signalling enzymes PI3K, Akt and mTOR. Results were plotted in triplicate, errors bars represent standard deviation and GI50 values were calculated using Graph Prism.

**A.**

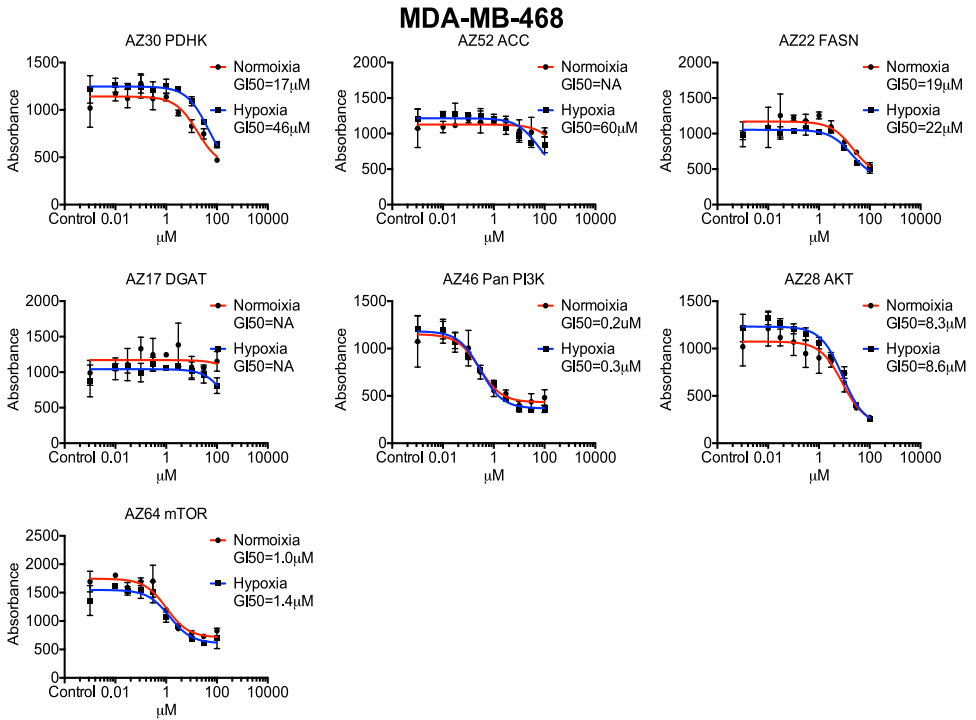

**B.**

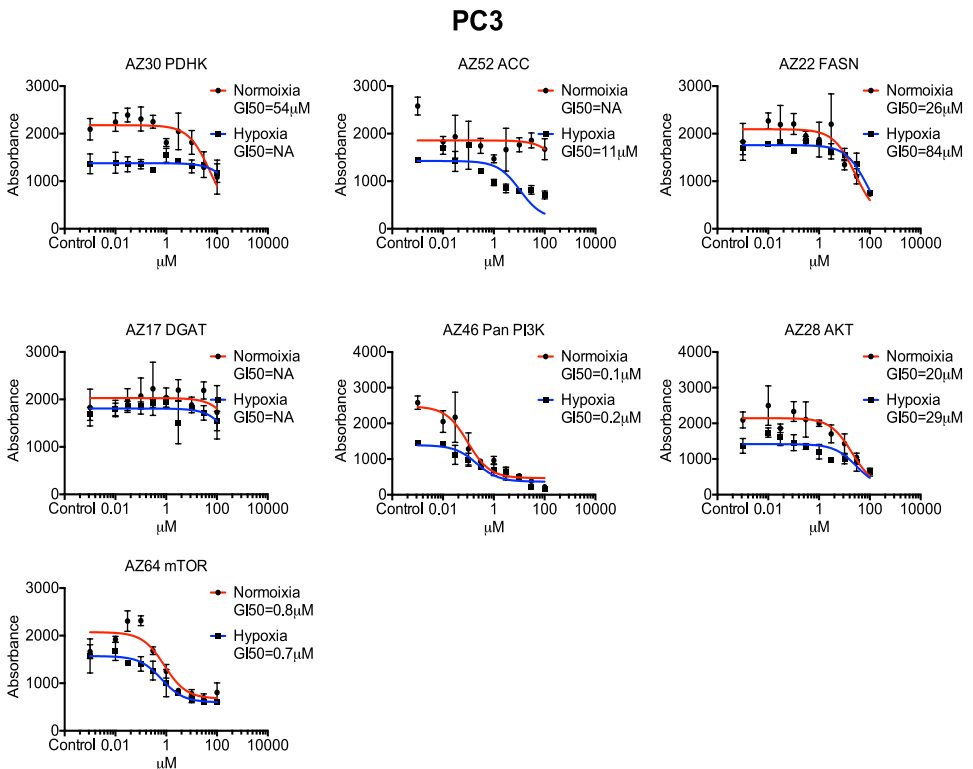

S. Figure 3. GI50 calculation of spheroids treated with inhibitors. (A) MDA-MB-468 on day 8 and (B) PC3 spheroids on day 12 treated with inhibitors against metabolic enzymes PDHK, ACC, FASN and DGAT, and signalling enzymes PI3K, Akt and mTOR. Between 5 and 15 spheroids were measured per condition, errors bars represent standard deviation and GI50 values were calculated using Graph Prism.

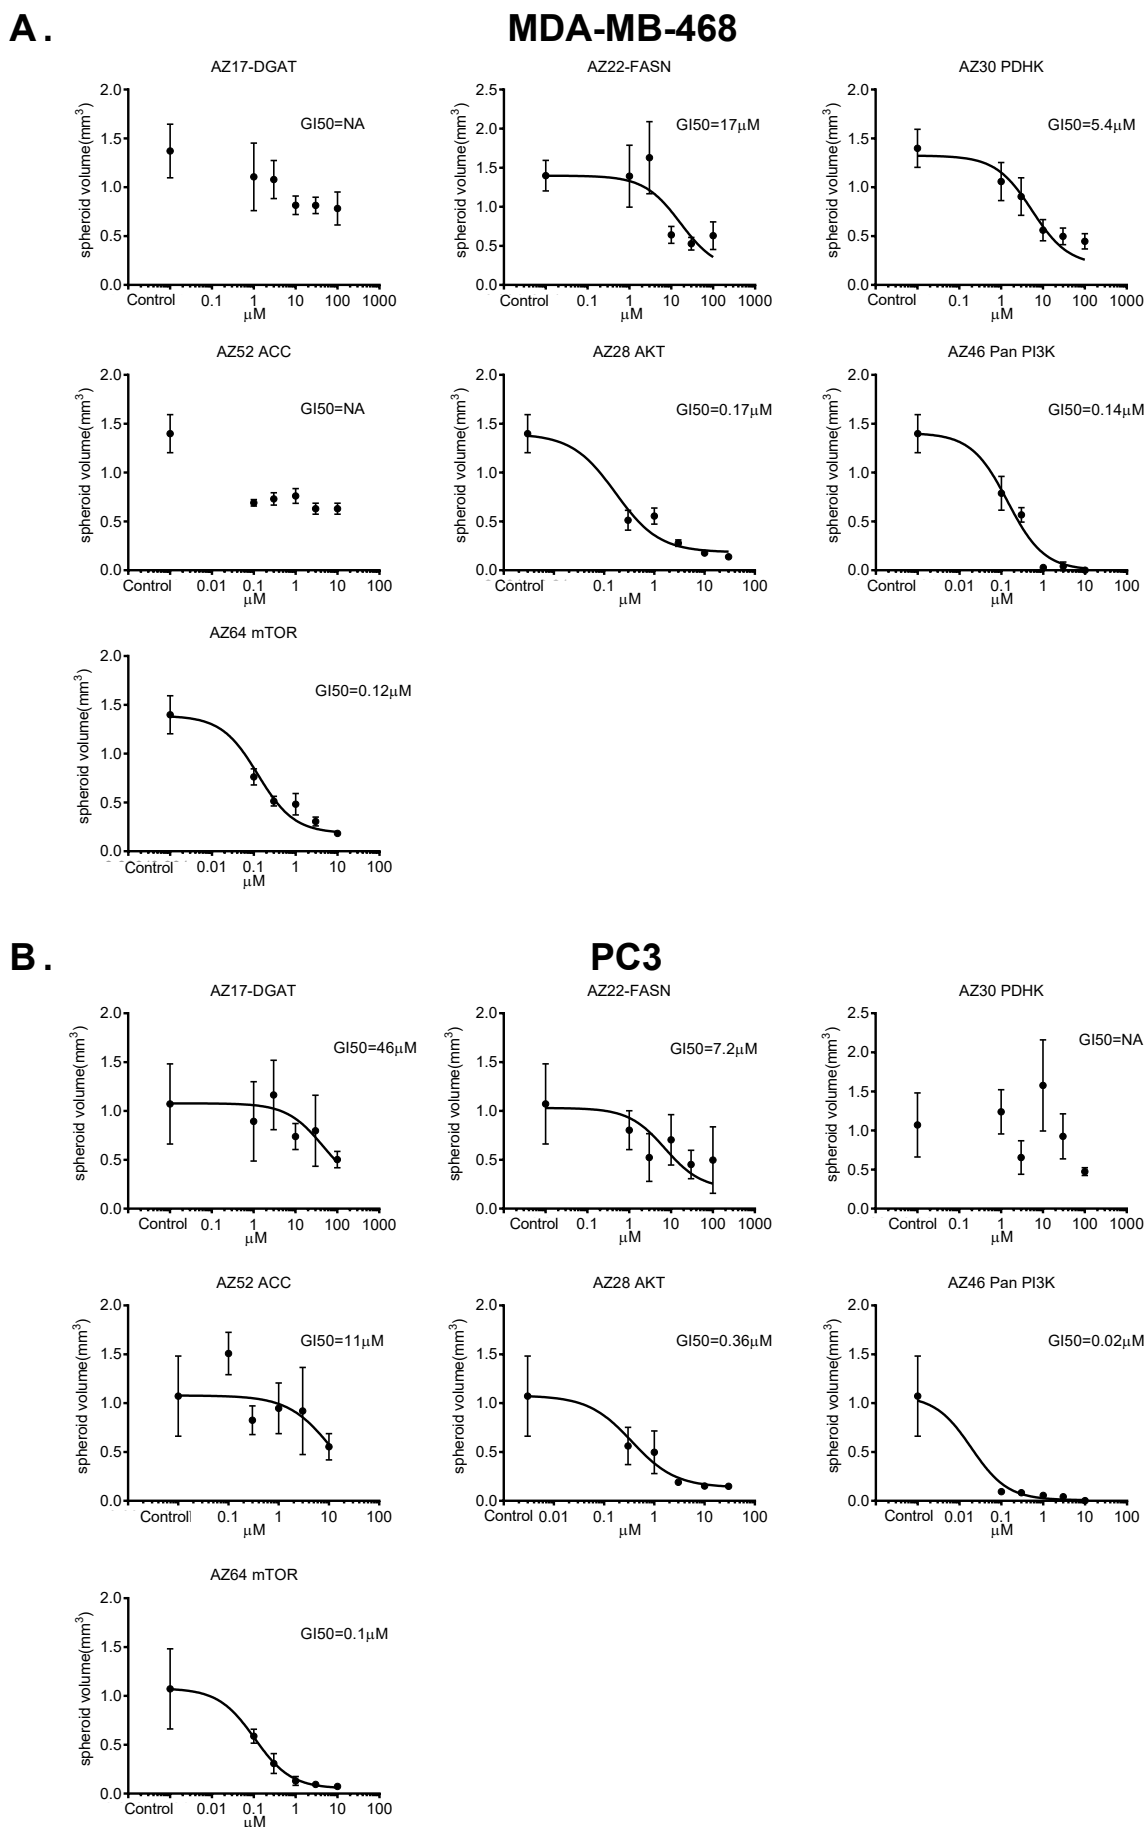

### A. AKT inhibition

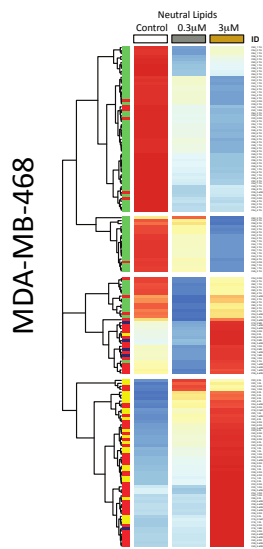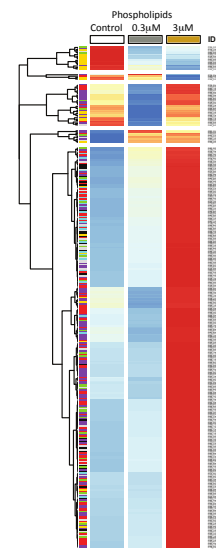

### B. PI3k inhibition

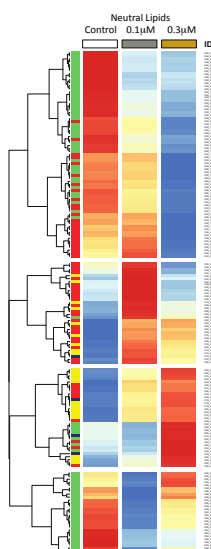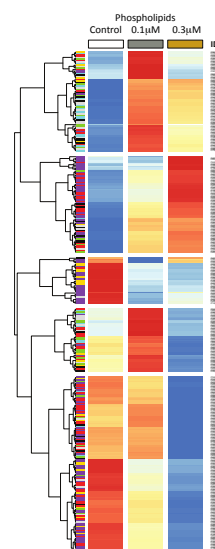

### C. mTOR inhibition

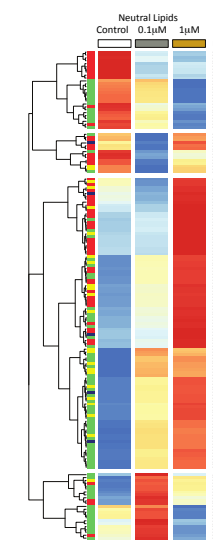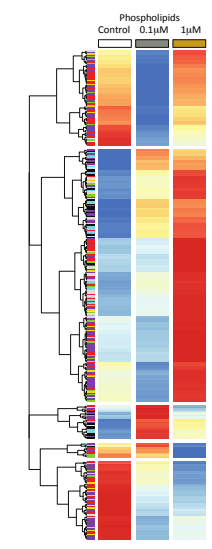

Neutral Lipids  
 FA  
 MG  
 DG  
 TG

Phospholipids  
 CL  
 PS  
 PI  
 PG  
 PA  
 PC  
 PE

PC3

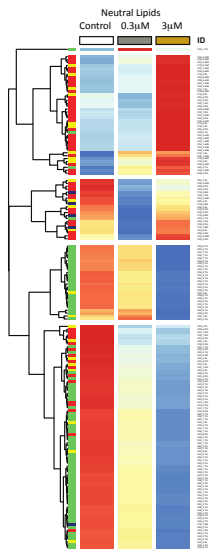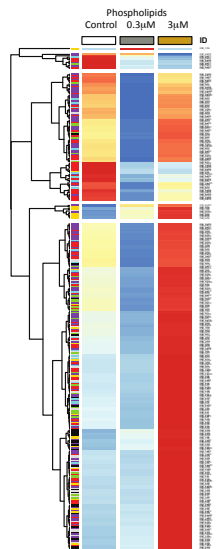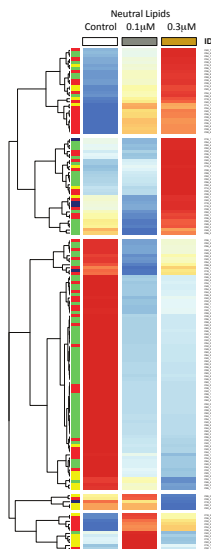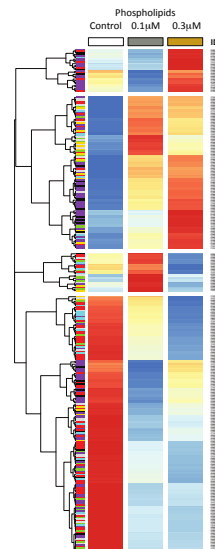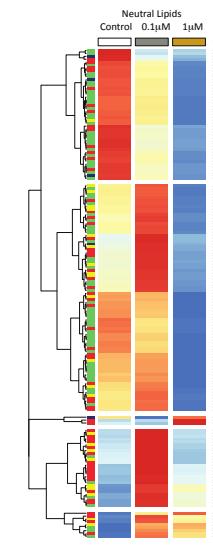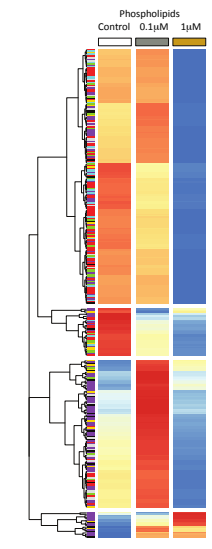

Fold Change  
 1  
 0.5  
 0  
 -0.5  
 -1

S. Figure 4. Clustered heat map analysis of lipids in MDA-MB-468 and PC3 spheroids treated for 4 days with A. AKT, B. PI3K and C. mTOR inhibitor at different concentrations. All Lipids were compared against DMSO control. Side covariates indicate lipid families, and lipids within each family are sorted by name.

### A. FASN Inhibition

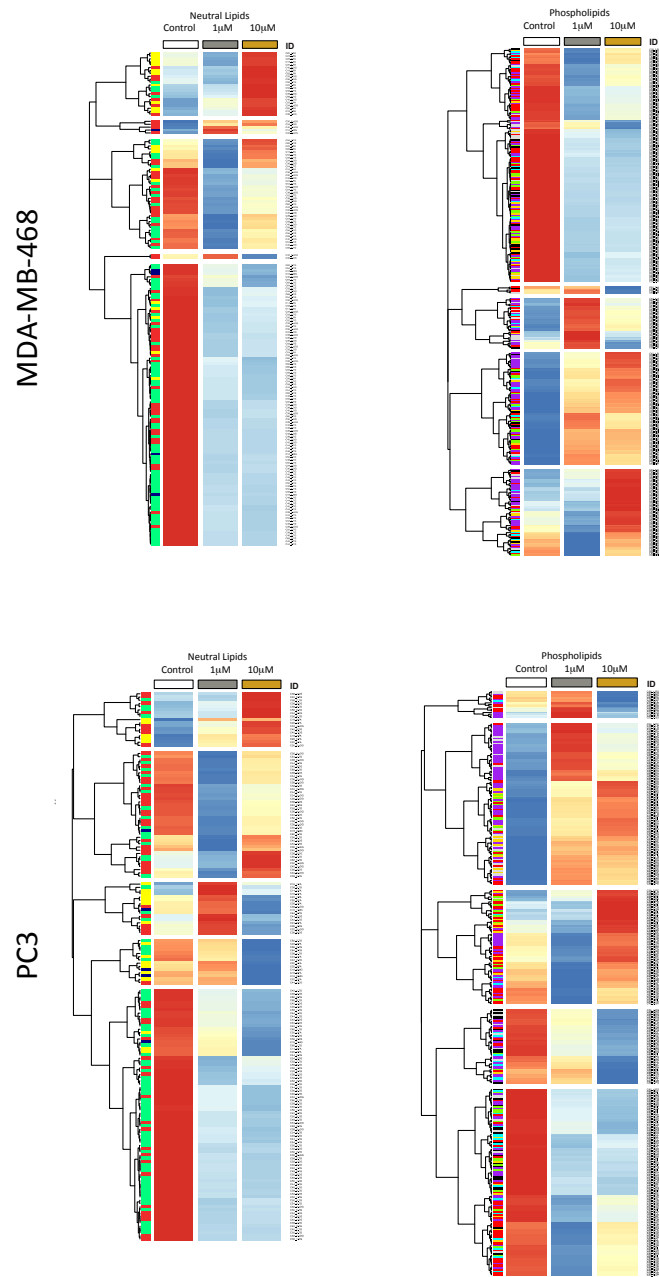

### B. DGAT Inhibition

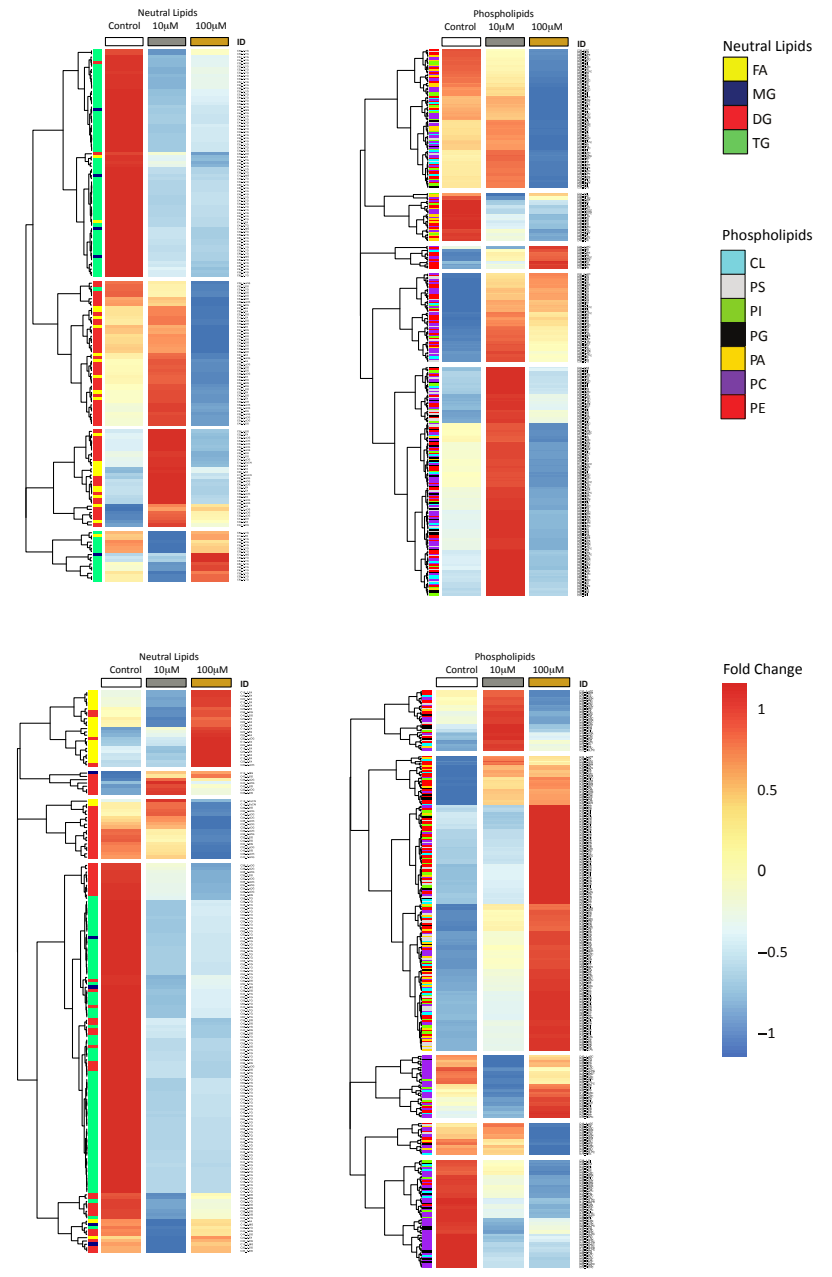

S. Figure 5. Clustered heat map analysis of lipids in MDA-MB-468 and PC3 spheroids treated for 4 days with A. FASN and B. DGAT inhibitor at different concentrations. All Lipids were compared against DMSO control. Side covariates indicate lipid families, and lipids within each family are sorted by name.

### A. ACC Inhibition

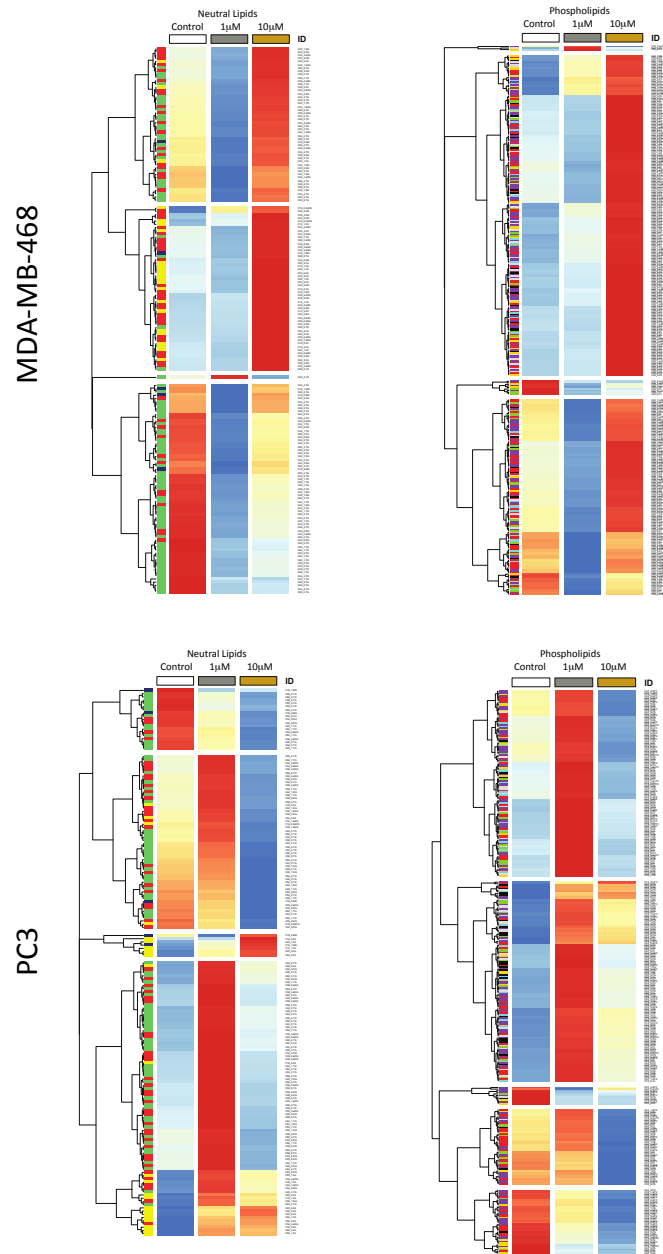

### B. PDHK Inhibition

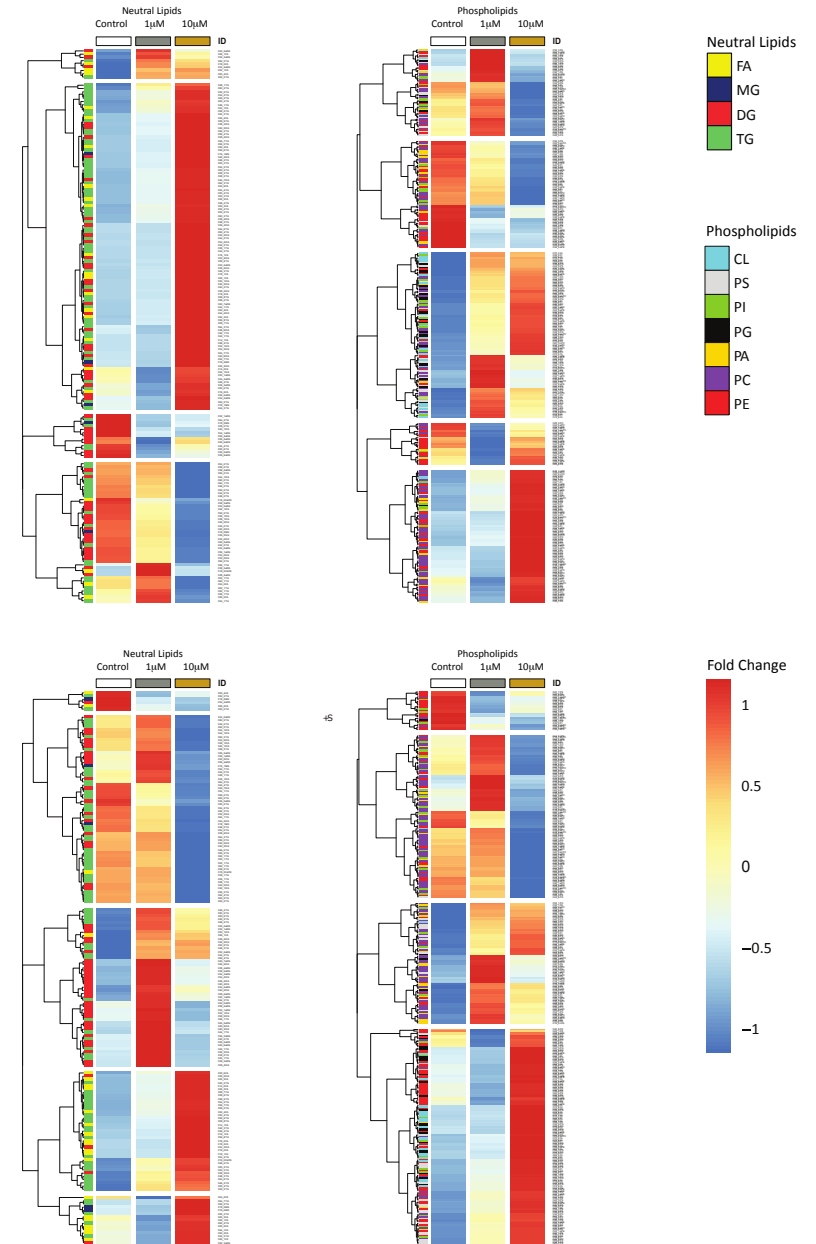

Neutral Lipids

- FA
- MG
- DG
- TG

Phospholipids

- CL
- PS
- PI
- PG
- PA
- PC
- PE

S. Figure 6. Clustered heat map analysis of lipids in MDA-MB-468 and PC3 spheroids treated for 4 days with A. ACC and B. PDHK inhibitor at different concentrations. All Lipids were compared against DMSO control. Side covariates indicate lipid families, and lipids within each family are sorted by name.



S. Figure 8. Analysis of saturated, mono-unsaturated and poly-unsaturated phospholipids in MDA-MB-468 and PC3 spheroids. Levels of PC, PE, PI, PS, and SM in MDA-MB-468 and PC3 spheroids treated with inhibitors against metabolic enzymes PDHK, ACC, FASN and DGAT, and signalling enzymes PI3K, Akt and mTOR at two different concentrations. Data were converted to log<sub>2</sub> scale for each replicate. Abundance of saturated, monounsaturated and polyunsaturated members within each family were then compared using one-way ANOVA, followed by Tukey Post-hoc test for pair-wise comparison (\* p<0.05).

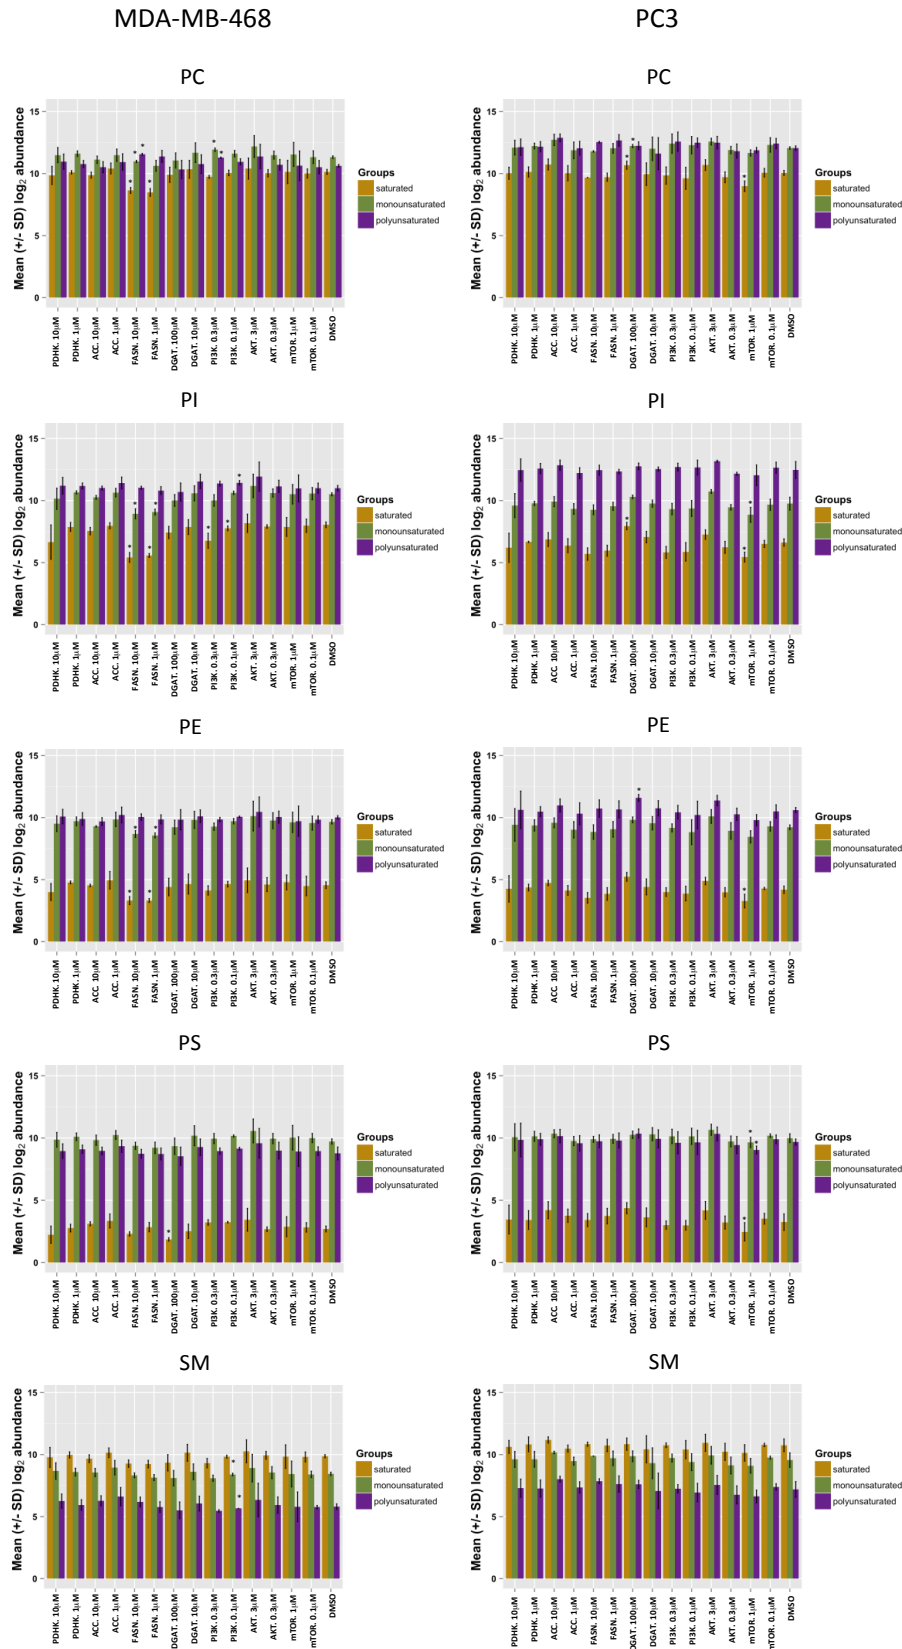

Supplement: NIHMS1033732-supplement-Supplemental_Data.pdf [file NIHMS1033732-supplement-Supplemental_Data.pdf]
